# Supplementary material for: Genomic evidence for recurrent genetic admixture during domestication mediterranean olive trees (Olea europaea)
Source: bioRxiv or medRxiv preprint supplement (doi:10.1101/2020.03.28.013227), 2020-03-29
Supplement: Supplementary file [file media-1.pdf]

## Additional file 1

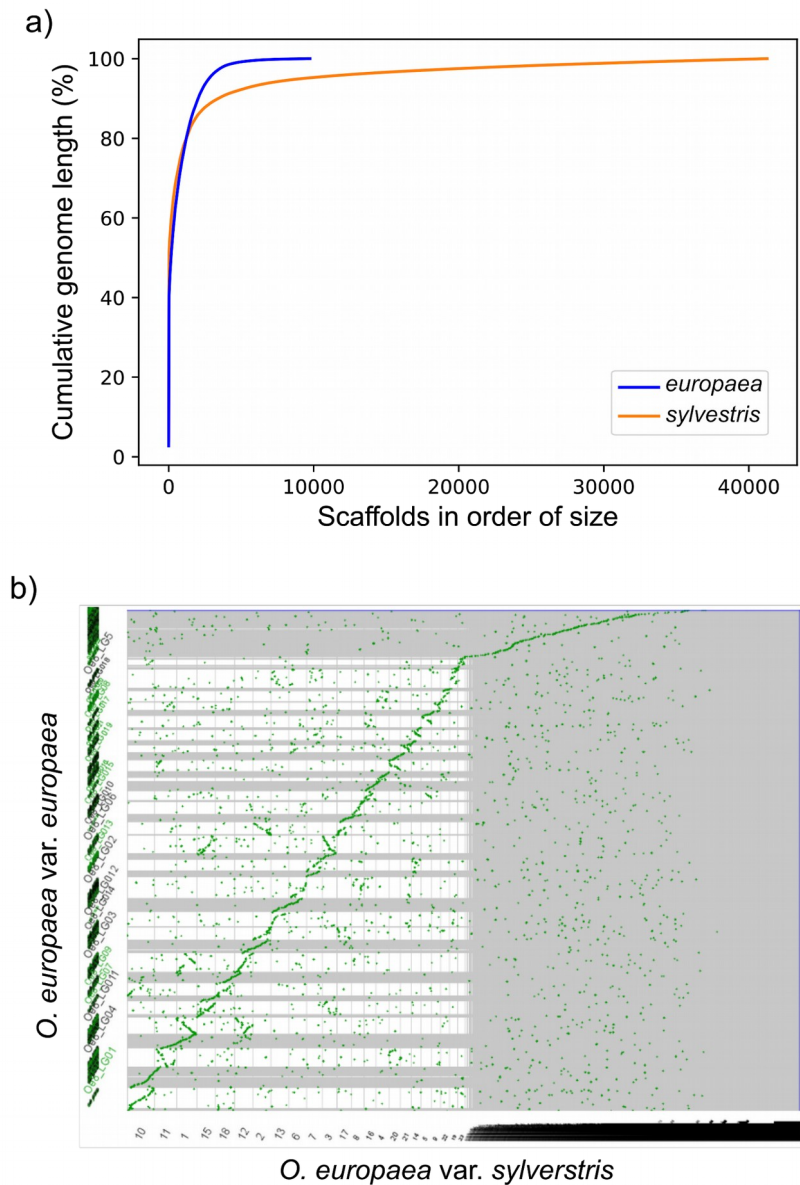

**Fig. S1. Genome comparison of *sylvestris* and *europaea*.** (a) Cumulative genome length per scaffold ranked in order of size for the genome assembly of *europaea* (red) and *sylvestris* (blue). A straight vertical line represents a perfect genome assembly. The horizontal plateaus indicates many small scaffolds. The top right end of each curve shows the total number of scaffolds. (b) Syntenic plot of the genome of *europaea* against *sylvestris* generated by SynMap.

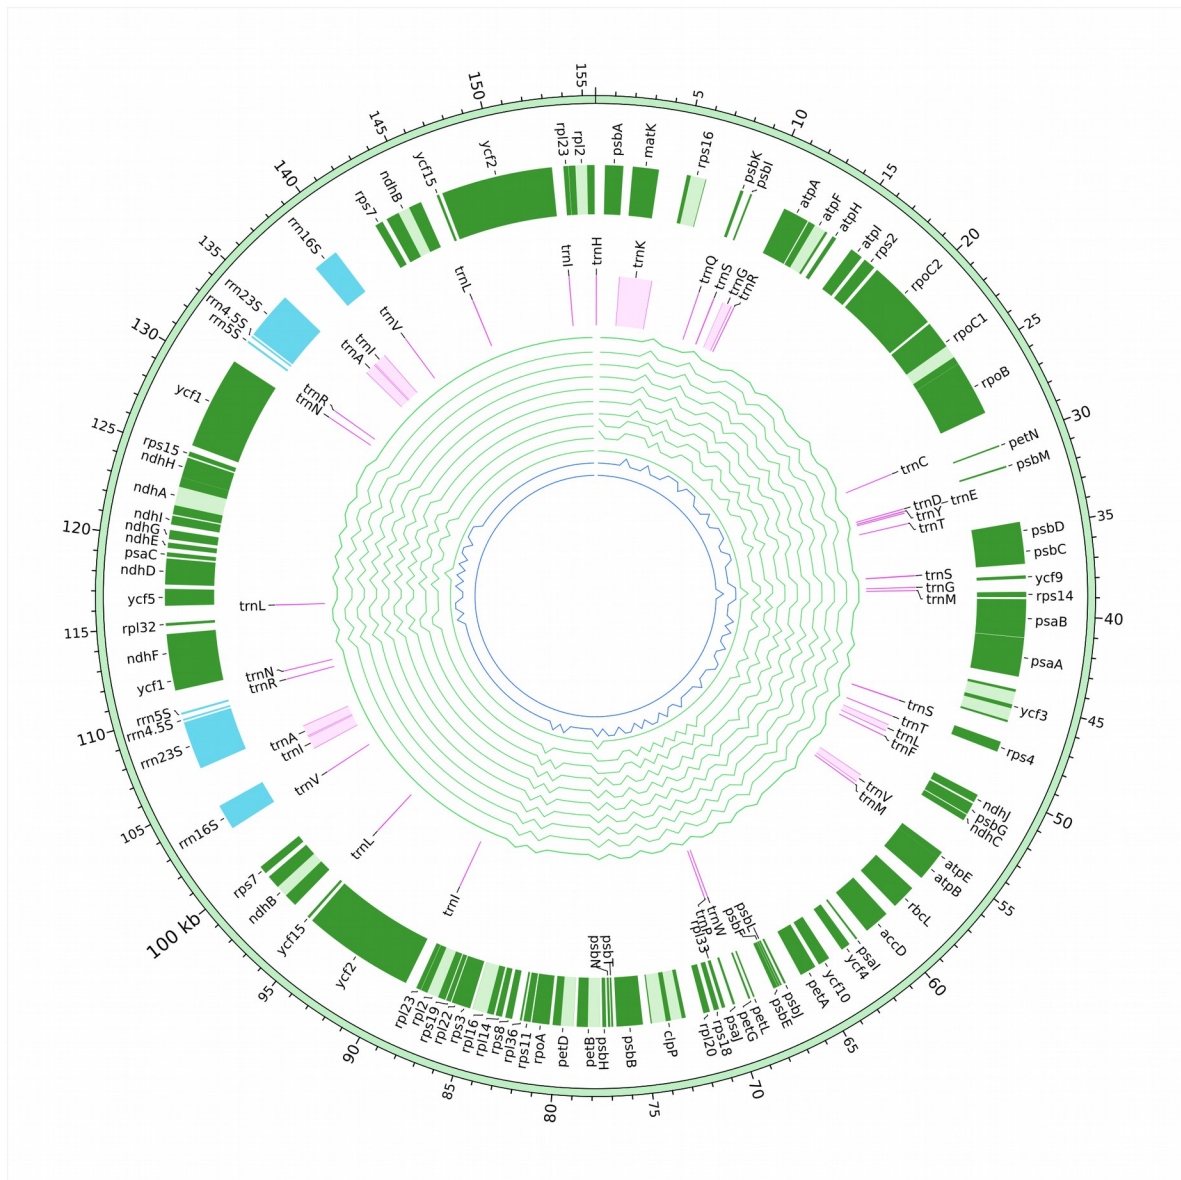



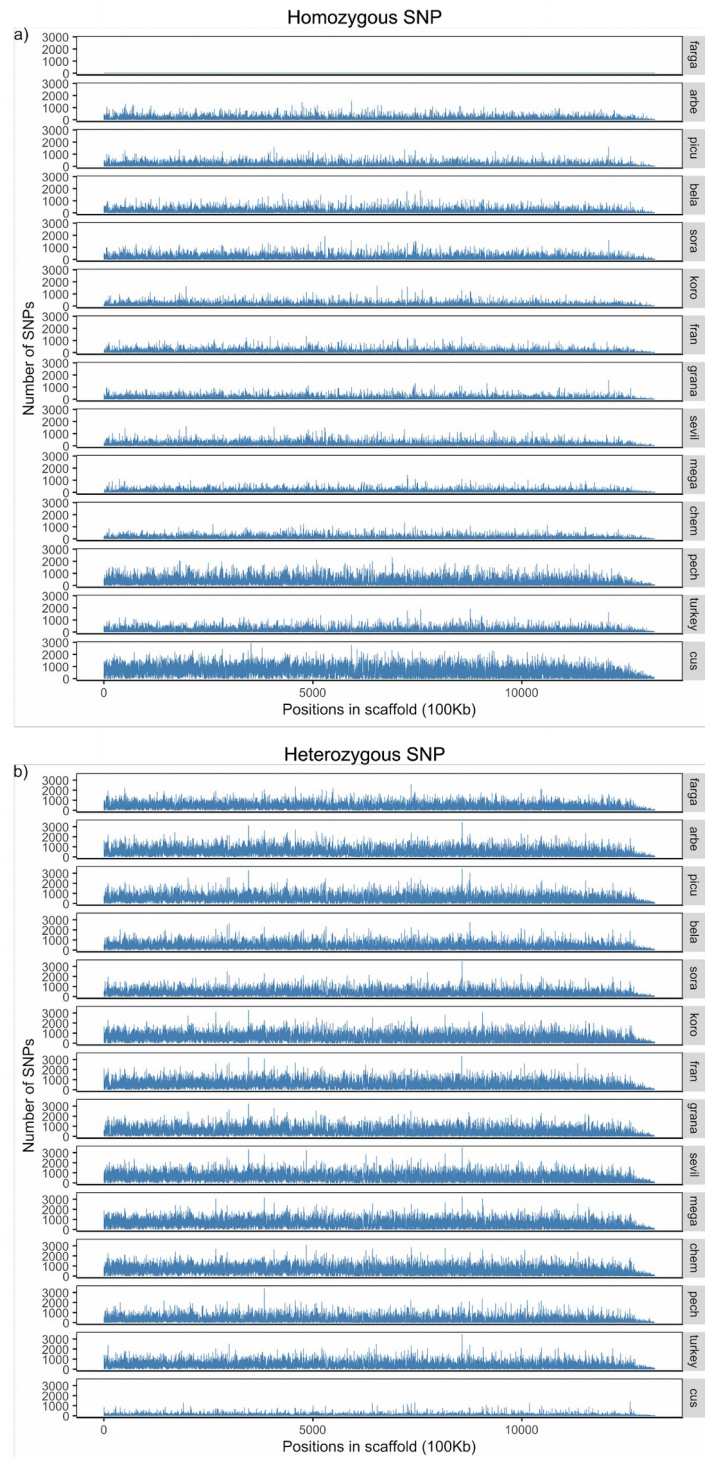

**Fig. S4. SNP distribution along the nuclear genome in windows of 100 Kb. (a)** homozygous SNPs, **(b)** heterozygous SNPs. Since cv. Farga was used as a reference genome, we do not expect homozygous SNPs for this sample.

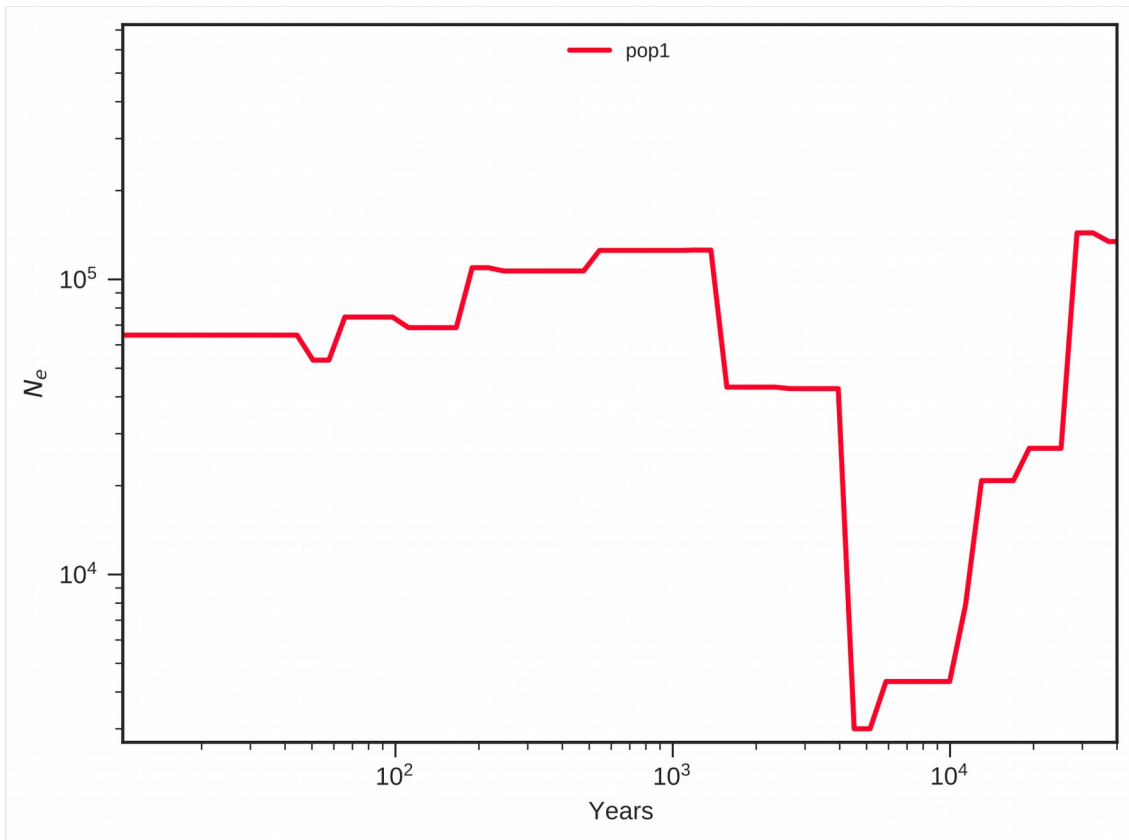

**Fig. S5. SMC++ results for inferring population size histories in cultivated olives.** A generation time of 20 years was used to convert coalescent scaling to calendar time.

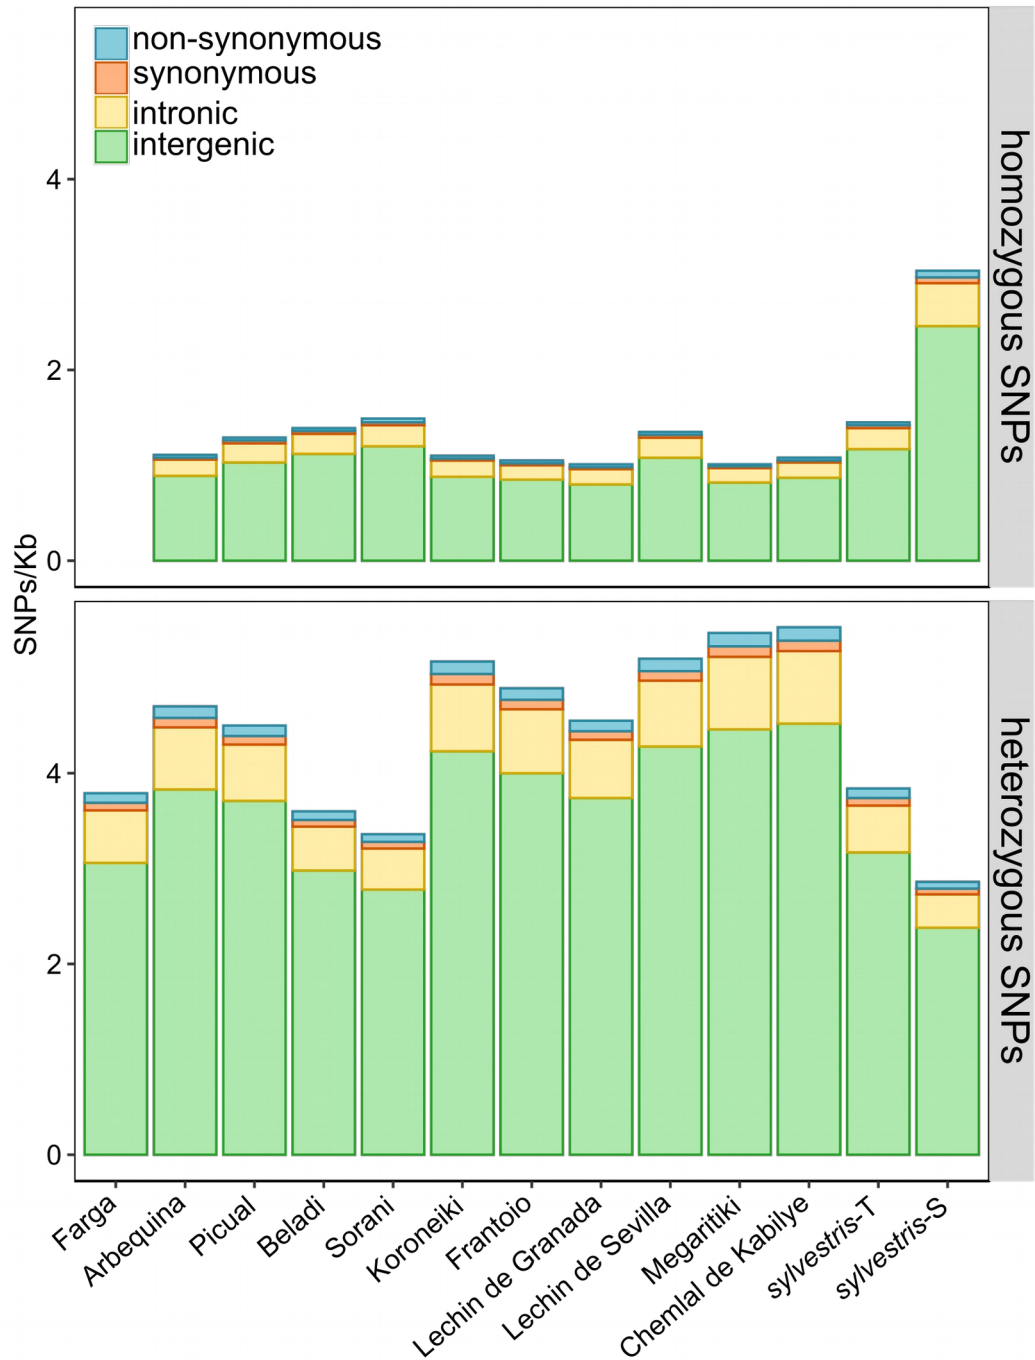

**Fig. S6. Number of homozygous and heterozygous SNPs (SNPs/Kb) in the intergenic, intronic and coding region of the genome.** The coding region was divided according to the changes that the allele can produce (synonymous and nonsynonymous).

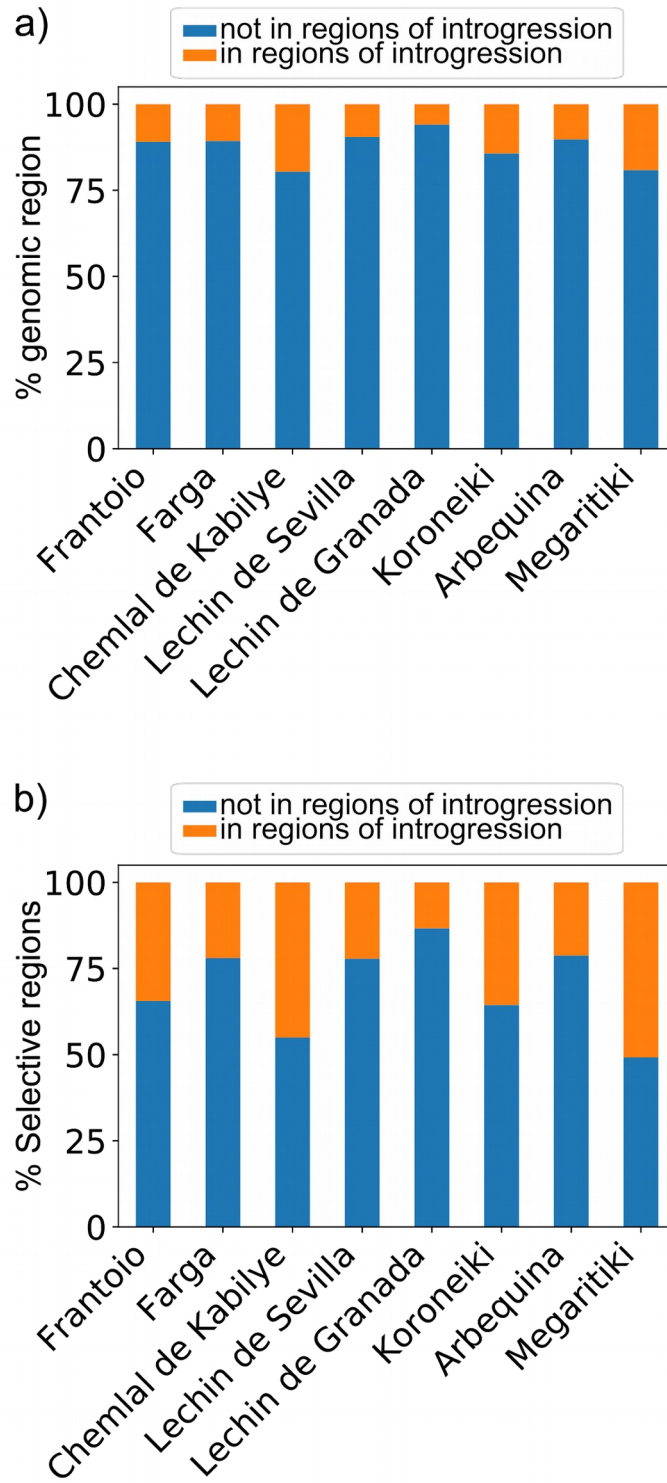

**Fig. S7. a)** Plot showing the percentage of genomic regions with introgression (D-statistic  $> 0.5$ ). **b)** Plot showing the percentage of selective sweeps that are present in introgressed regions.
